1 **Moving in complex environments: a biomechanical analysis of locomotion on inclined**  
2 **and narrow substrates.**

3

4 Christofer J. Clemente<sup>1,2</sup>, Taylor J.M. Dick<sup>3</sup>, Rebecca Wheatley<sup>2</sup>, Joshua Gaschk<sup>1</sup>, Ami  
5 Fadhillah Amir Abdul Nasir<sup>2</sup>, Skye F. Cameron<sup>2</sup>, Robbie S. Wilson<sup>2</sup>

6

7 1. School of Science and Engineering, University of the Sunshine Coast, QLD, Australia.

8 2. School of Biological Sciences, University of Queensland, QLD, Australia.

9 3. School of Biomedical Sciences, University of Queensland, QLD, Australia.

10 **Abstract**

11 Characterisation of an organisms' performance in different habitats provides insight into the  
12 conditions that allow it to survive and reproduce. In recent years, Northern quolls (*Dasyurus*  
13 *hallucatus*)—a medium-sized semi-arboreal marsupial native to northern Australia—have  
14 undergone significant population declines within open forest, woodland and riparian habitats,  
15 but less so in rocky areas. To explore this decline, we quantified the biomechanical  
16 performance of wild Northern quolls over inclined narrow (13 mm pole) and inclined wide  
17 (90 mm platform) substrates. We predicted that quolls may possess biomechanical  
18 adaptations to increase stability on narrow surfaces, which are more common in rocky  
19 habitats. Our results display that quolls have some biomechanical characteristics consistent  
20 with a stability advantage on narrow surfaces. This includes the coupled use of limb pairs and  
21 high grip torques (Max = 68.9 N.m, Min = -69.9 N.m), highlighting their ability to generate  
22 corrective forces to counteract the toppling moments commonly encountered during gait on  
23 narrow surfaces. However, unlike other arboreal specialists such as primates, speed was  
24 constrained on narrow surfaces, and quolls did not adopt diagonal sequence gaits. Quolls  
25 appear to adopt similar performance characteristics to cats and dogs which may limit their  
26 ability to outperform these key predators (invasive or otherwise) in particular habitats. This  
27 overlap may contribute to the declining population of Northern quolls on mainland Australia.

28

29

30

31

32

33

34

35

36 **Keywords:** performance, northern quoll, torque, ground reaction force, kinematics, kinetics

## 37 **Introduction**

38 An ecological niche is the set of environmental conditions that enable a species to grow and  
39 reproduce (Schoener, 2009). The fitness of an organism is largely defined by its performance  
40 in any environment which in turn depends upon morphology and physiology (Garland Jr and  
41 Losos, 1994, Arnold, 1983). Thus, characterisation of a species' performance across different  
42 habitats provides insight into the conditions that allow for an animal to survive and reproduce.  
43 All behaviours require movement, thus the niche that an animal occupies is largely dependent  
44 on movement capabilities; for example, if an animal cannot climb trees it cannot fill a niche  
45 that is wholly or partially arboreal. Further, an animal's performance will change with respect  
46 to environmental conditions that hinder movement. Understanding the locomotor capabilities  
47 of a species is key for understanding its niche, which may allow us to quantify the habitat  
48 requirements for conservation. One species of conservation significance in Australia is the  
49 Northern quoll (*Dasyurus hallucatus*; Gould, 1842).

50 Northern quolls are primarily nocturnal, partially arboreal marsupial carnivores, found in  
51 grassy or rocky habitats across northern Australia (Schmitt et al., 1989, Oakwood, 2000). The  
52 Northern quoll has declined from a broad distribution across northern Australia to several  
53 disjunct populations often centred on rocky plateaus with local extinctions primarily  
54 occurring in lowland savanna (Braithwaite and Griffiths, 1994, Morris, 1996, Braithwaite and  
55 Muller, 1997). Dingoes and feral cats are the main predators of Northern quolls, and both  
56 have been historically present across their range for 4000 and over 100 years, respectively  
57 (Burbidge et al., 1988, Corbett, 1995). The reason for the recent rapid decline in population is  
58 therefore complex. However, it has been hypothesised that habitat loss or fragmentation (due  
59 to land clearing, altered fire regimes, or grazing by invasive herbivores) can leave smaller  
60 mammalian species more vulnerable to predation (Newsome, 1975, Burbidge and McKenzie,  
61 1989, McKenzie et al., 2007). In a study on quoll survival, Oakwood (2000) reported that all  
62 Northern quolls killed by predators were killed within forest, woodland and riparian habitats,  
63 and that few kills occurred in rocky outcrops. Also, females whose home ranges included a  
64 greater proportion of rocky habitat, were more likely to survive to a second breeding season.  
65 This suggests that rocky habitats may increase the survival of Northern quolls.

66 Greater survival in rocky habitats could be due to either a higher density of refugia or a lower  
67 abundance of large predators in these habitats. Dingoes, a major predator of quolls, mainly  
68 hunt on floodplains during the dry season and in the forest during the wet season, and are

69 most successful in open habitats (Corbett, 1995). Dingoes were never observed on the rocky  
70 hills during this study, suggesting that the locomotion of dingoes may be compromised in  
71 these habitats relative to open areas. Similar strategies have been shown in feral cats, which  
72 occupy open habitats more frequently than complex ones (Hohnen et al., 2016) and display  
73 better hunting success in these open habitats when compared to complex ones (McGregor et  
74 al., 2015).

75 The differential survival of a species across various habitats will be due to changes in their  
76 detection by predators or ease of capture after detection. Studying the performance of a  
77 species vulnerable to predation across various types of terrain allows one to make predictions  
78 about the relative performances between predator and prey. This can provide the basis for a  
79 mechanistic understanding of predation and its conservation significance.

80 Our study examined the kinematics and kinetics of Northern quolls in both simplified  
81 terrestrial and arboreal environments, designed to represent aspects of their natural habitat.  
82 We categorised their biomechanics across two different substrates: an inclined wide platform,  
83 and an inclined narrow pole. We then compared the quolls' biomechanics on each of these  
84 substrates with biomechanical strategies used by arboreal specialists (such as primates and  
85 possums) and terrestrial specialists (such as rats, cats, and dogs) to compare the relative  
86 performances of quolls to these groups of animals. We hypothesized that within complex  
87 arboreal-like habitats quolls would modify biomechanical characteristics to be more  
88 reflective of arboreal species, and therefore help to explain their increased survival in these  
89 habitats.

## 90 **Materials and Methods**

### 91 *Morphology*

92 Northern quolls were trapped on Groote Eylandt, Northern Territory, Australia, between July  
93 and August 2013 using Tomahawk original series cage traps (20 x 20 x 60 cm; Tomahawk  
94 ID-103, Hazelhurst, Winconsin, USA) baited with canned dog food. Traps were set overnight  
95 and checked early in the morning (no later than 7:30 am) to avoid quolls being subjected to  
96 warmer parts of the day. A total of 24 individual quolls (9 males, 15 females) were captured  
97 throughout the study period. Each quoll was taken to the Anindilyakwa Land and Sea Ranger  
98 Research Station for subsequent experiments. All individuals received a micro-chip (Trovan  
99 nano-transponder ID-100, Keysborough, Australia) that was placed subcutaneously between  
100 the shoulder blades to ensure identification during any subsequent recaptures. Research  
101 methodologies were approved by the University of Queensland animal ethics committee  
102 (SBS/541/12/ANINDILYAKWA/MYBRAINSC) and were conducted under the Northern  
103 Territory Parks and Wildlife Commission (permit number: 47603).

104 Body mass was measured for each individual using an electronic balance ( $\pm 0.1$  g; A & D  
105 Company Limited HL200i, Brisbane, Australia) and eleven morphological variables were  
106 each measured three times using digital calipers, with an average used as the overall measure  
107 (Whitworth, Brisbane, Australia,  $\pm 0.01$  mm) (Wynn et al., 2015). These body dimensions  
108 were included as covariates in our initial analysis, but none appeared to have a significant  
109 effect on our results and thus were not included in further analysis. Mean body mass was  
110  $384.3 \pm 21.5$  g, head width (widest point of jaw)  $36.07 \pm 0.47$  mm, head length (from nuchal  
111 crest to tip of snout)  $67.22 \pm 0.73$  mm, body length (nuchal crest to base of tail)  $179.92 \pm 3.32$   
112 mm, right and left fore-limb length (radius-ulna)  $50.91 \pm 0.75$  mm, right and left hind-limb  
113 length (tibia-fibula)  $63.75 \pm 0.79$  mm, right and left hind-foot length (heel to claw base)  
114  $38.49 \pm 0.48$  mm, tail width (maximum tail diameter)  $14.54 \pm 0.43$  mm and tail length (base  
115 to tip of tail)  $228.48 \pm 4.49$  mm. To minimize long-term stress on the animals, all  
116 performance measures and tests were completed within 6 hours of capture, after which the  
117 animals were released at the exact point of capture.

### 118 *Kinematics and kinetics*

119 To assess the biomechanics of Northern quolls, we filmed each individual as it moved over  
120 two different raised platform trackways. Trackways were suspended within a Perspex box

121 (2600 × 470 × 160 mm) with a release and escape box at the start and end, respectively  
122 (Figure 1).

123 Quolls were run along the two trackways (angle, pole) in a random order, to represent  
124 different habitat types that a quoll is likely to encounter in its natural environment. The  
125 inclined platform was a 90 mm wide plank of wood, covered in fine sandpaper (P120) to  
126 provide traction at a 40<sup>o</sup> angle, and represented a terrestrial environment. The inclined pole  
127 was a 12 mm diameter wooden dowel running the length of the box at a 40<sup>o</sup> angle, and  
128 represented an arboreal environment. A third flat platform trackway (90 mm wide platform)  
129 was also tested, but later excluded (see excluded strides). Both tracks ran the length of the  
130 box with a force platform (Nano-17 titanium, ATI instruments) placed level and centrally  
131 with the trackway, with either a 90 x 90 mm platform or a 90 mm long doweling attached to  
132 its top.

133 Two cameras (Fastec IL-3, Fastec Imaging, 1280 x 700 pixels, @ 250 fps) were positioned  
134 approximately perpendicular to each other, to capture a ventral/lateral, and lateral/dorsal view.  
135 These camera positions were used to ensure footfalls were visible in both camera views, yet  
136 allowed enough variation in viewing angle that 3-dimensional position information was still  
137 accurate. Cameras were synchronized using internal triggers. The cameras were calibrated  
138 using a wand based camera calibrate, implemented in the Argus software in Python Ver 2.1,  
139 (Jackson et al., 2016). The Matlab GUI DLTdv5 (Hedrick, 2008) was then used to track  
140 individual feet and a single spot on the back, close to the body centre of mass.

#### 141 *Analysis*

##### 142 (i) Timing parameters and gait

143 Feet were digitised for the duration of contact with the surface of calibrated racetrack. A  
144 mark near the body centre of mass was used to calculate speed. Footfall sequence and gait  
145 parameters were calculated using antero-posterior sequence methods (Abourachid, 2003,  
146 Chadwell and Young, 2015). The first forefeet touchdown defined the start of a sequence and  
147 its subsequent touchdown defined the end of the sequence. F-lag, H-lag and P-lag were  
148 calculated as the temporal lag between the mid-stances of the two forefeet, hindfeet and  
149 averaged across the ipsilateral feet respectively. We used the gait parameters described by  
150 Abourachid (2003) and Chadwell and Young (2015). Speed was calculated for the duration of  
151 the sequence, and duty factor was calculated as the average duty factor of feet within a

152 sequence. We examined the effects of, and interaction between, speed and surface for the  
153 time lag between footfalls of the forefeet (F.lag), hindfeet (H.lag) and the difference between  
154 the fore and hindfeet (P.lag) to determine which pairs of limbs may be contributing most to  
155 increasing stability on narrow perches.

156 (ii) Spatial parameters

157 We further examined the effects of the absolute distance between the left and right fore-foot  
158 (F.dist), the left and right hindfoot (H.dist) and the mean distance between the forefoot pair  
159 and the hindfoot pair (P.dist). Since the lateral distance effects are likely to be constrained on  
160 narrow supports we further examined the distance in the fore-aft axis for each variable  
161 (F.distX, H.distX and P.DistX respectively).

162 (iii) Substrate reaction forces

163 Substrate reaction forces were recorded for each foot individually or for multiple feet  
164 simultaneously using an ATI Nano17 6 dof micro force transducer (ATI instruments). The  
165 forceplate was calibrated by the company with estimated error of  $< 0.75\%$  in the x, y, and z  
166 axes. The force plate was aligned with the x-axis representing the fore-aft direction, y  
167 representing the lateral direction, and z representing vertical forces. The transducer output  
168 forces in these three axes along with torques about each axis. Torques about the axes are  
169 likely dependent on the position of the footfall relative to the centre of the force transducer  
170 and therefore of limited use, with the exception of the torque about the x-axis on the narrow  
171 trackway. In this setup, the narrow pole was less than the width of the foot. Thus, we assume  
172 the position of the footfall must more or less align with the x-axis of the force plate, and  
173 therefore we included this torque in our analysis.

174 Strides where any foot partially stepped on the plate were excluded from further analysis.  
175 Forces were synchronised with the video footage to identify each foot as it struck the  
176 platform. For each foot stride we measured the maximum and minimum force, as well as the  
177 integral of the force-time profile using the trapezoidal numeration integration function  
178 (trapz.m) in matlab, for the fore-aft, medial-lateral and dorsal-ventrally directed forces. We  
179 corrected for the inclined slope in the fore-aft forces, by multiplying fore-aft force by the  
180 cosine of the slope (40 degrees), and removing the sine of the vertical force. Similarly we  
181 corrected vertical forces by multiplying it by the sine of the angle and adding the cosine of  
182 the fore-aft forces. This rotated forces such that they were comparable to flat-trackway forces.

183 (iv) Excluded strides

184 To determine the extent to which steady state trials were included in this study we estimated  
185 the average acceleration over several strides within the field of view for each run.  
186 Acceleration was estimated as the slope of speed over time throughout the run. While runs  
187 over the angle and pole surface had a median value around zero, runs over the flat surface  
188 show a distinct decelerating trend (Supp Fig. 2). Therefore we excluded all these strides from  
189 our main analysis, but we chose to present them in the supplementary material as a means of  
190 visual comparison of differences between angled platforms and the pole runs. Caution should  
191 be used in the interpretation of the runs along the flat surface, as it will be ambiguous the  
192 extent to which changes are the result of surface differences, or result from the inclusion of  
193 predominately breaking strides.

194 (v) Statistics

195 For all analyses, a within subject design was used, including subject as random factor using  
196 the lme.R function from the nlme package (Pinheiro et al., 2017) in R (ver 3.2.3 -- "Wooden  
197 Christmas-Tree"). To examine variation between factors we specified the model with lme.R  
198 function, and then used glht.R function from the multcomp package (Hothorn et al., 2008)  
199 to perform Tukey post hoc tests, correcting the P values using the Bonferroni adjustment  
200 method.

201

202

203

204

205

206

207

208 **Results**

209 *Speed*



210 Quolls with different body lengths did not use significantly different speeds when traversing  
211 the two platforms ( $F_{1,10} = 0.24$ ,  $P = 0.635$ ). However, quolls ran significantly faster on the  
212 wide platform than on the narrow pole ( $F_{1,181} = 22.8$ ,  $P < 0.001$ ) (Figure 2).

213 Speed also varied significantly with gait. For the inclined surfaces, speeds varied between  
214 gaits on the narrow pole ( $F_{4,206} = 3.68$ ,  $P = 0.006$ ), but not on the platform ( $F_{4,52} = 1.87$ ,  
215  $P = 0.130$ ). On the narrow pole, transverse gallops were slower than bounds ( $z = 3.49$ ,  $P =$   
216  $0.004$ ), and half bounds ( $z = 3.44$ ,  $P = 0.005$ ), but speeds during other gaits were not  
217 significantly different. Speed differences with gait were most prominent on the flat platform  
218 as reported in supplementary materials.

### 219 *Stride characteristics*

220 Duty factor varied with both speed ( $F_{1,266} = 238.39$ ,  $P < 0.001$ ) and surface ( $F_{1,266} = 224.71$ ,  $P$   
221  $< 0.001$ ), though there was no significant interaction between speed and surface ( $F_{1,266} = 1.39$ ,  
222  $P = 0.238$ ). Duty factor was highest on the inclined pole, reflecting the lower speeds on this  
223 surface. After removing the interaction term, surface still had a significant effect on the  
224 relationship between speed and duty factor, suggesting a significant difference in the  
225 intercept between the surfaces (Figure 3a). Thus, quolls are able to move along the pole at  
226 similar speeds to the inclined platform, but do so using a higher duty factor. This increase in  
227 duty factor is probably required in order to maintain stability, via increased contact time  
228 between the surface and the feet. However, in order to maintain similar speeds at higher duty  
229 factors, swing time must be greatly reduced. At any given speed the stride duration tends to  
230 be shorter for strides on the inclined pole when compared to the inclined platforms (Surf:  
231  $F_{1,267} = 6.72$ ,  $P = 0.010$ , Speed:  $F_{1,267} = 291.52$ ,  $P < 0.001$ ; Fig. 3b).

### 232 *Timing between footfalls.*

233 Differences in footfall timing between the forefeet (F.lag) was associated with speed, surface,  
234 and the interaction between the two (Speed,  $F_{1,263} = 20.98$ ,  $P < 0.001$ ; Surface,  $F_{1,263} = 10.16$ ,  
235  $P = 0.002$ ; Speed:Surface,  $F_{1,263} = 4.59$ ,  $P = 0.033$ ). Removing the interaction term affected  
236 the model fit, suggesting significant differences in the slope and intercept between the  
237 surfaces ( $L.ratio = 4.55$ ,  $P = 0.033$ ). F.lag decreased rapidly with speed on the inclined  
238 platform (Fig. 4a) This effect was reduced on the inclined pole, with shorter F.lag being  
239 preferred across speeds, indicating the forefeet are acting in unison on narrow poles (Figure  
240 4a). Results from flat surfaces, presented only in the supplementary materials, show a

241 significantly steeper slope than both the inclined platform and the inclined pole (Supp. Figure  
242 5). Overall this suggests that there is a tendency to increase the temporal distance between the  
243 forefeet at higher speeds, but this is greatly constrained on narrower surfaces.

244 Conversely, the time difference between footfalls of the hindfeet (H.lag) was not significantly  
245 affected by speed or surface on the inclined surfaces (Square root transformed H.lag: Speed,  
246  $F_{1,266} = 0.05$ ,  $P = 0.825$ ; Surface,  $F_{1,266} = 0.22$ ,  $P = 0.636$ ; Figure 4b). H.lag was negatively  
247 and linearly related to speed for the flat surface ( $F_{1,160} = 82.2$ ,  $P < 0.001$ ; See Supplementary  
248 Material). On flat surfaces, H.lag tended to be highest for the low speeds, but was greatly  
249 restrained with values close to zero (indicating simultaneous footfall of both hindfeet) at  
250 higher speeds. Overall hindfeet tend to be used simultaneously (indicated by short time lags)  
251 on all speeds and surfaces.

252 Time lag between the mean forefeet and hindfeet strike (P.lag) was significantly correlated  
253 with speed ( $F_{1,266} = 18.75$ ,  $P < 0.001$ ; Fig. 4c), but not with surface ( $F_{2,266} = 1.89$ ,  $P = 0.169$ ),  
254 while the interaction between surface and speed was close to statistical significance ( $F_{1,266} =$   
255  $3.63$ ,  $P = 0.057$ ). When analysing each surface separately, there was no significant effect of  
256 speed on P.lag for the inclined platform ( $F_{1,59} = 0.09$ ,  $P = 0.758$ ), but a significant effect of  
257 speed was found on the inclined pole ( $F_{1,220} = 34.5$ ,  $P < 0.001$ ). On this latter surface, higher  
258 speeds were associated with a reduction in the phase lag between the fore and hindfeet (Fig.  
259 4c).

#### 260 *Distance between footfalls*

261 The hindfeet were generally kept much closer together ( $0.033 \pm 0.002$  m; mean  $\pm$  se for all  
262 trials) than the forefeet ( $0.040 \pm 0.002$  m). The absolute total distance between the forefeet  
263 was significantly larger on the inclined platform than the inclined pole ( $F_{1,78} = 151.17$ ,  $P <$   
264  $0.001$ ; Figure 5a), but was not affected by speed ( $F_{1,78} = 0.98$ ,  $P = 0.323$ ), nor by the  
265 interaction between speed and surface ( $F_{1,78} = 0.74$ ,  $P = 0.394$ ). When examining footfall  
266 distance in only the fore-aft axis, forelimb distance (F.distX) decreased with speed ( $F_{1,78} =$   
267  $6.36$ ,  $P = 0.014$ ), and was greater on the inclined platform than the inclined pole ( $F_{1,78} = 8.51$ ,  
268  $P = 0.005$ ; Figure 5a). Similarly, the interaction between speed and surface did not affect  
269 F.distX.

270 The absolute distance between the hindfeet was significantly smaller on the inclined pole  
271 than the inclined platform ( $F_{1,76} = 2.05.97$ ,  $P < 0.001$ ; Fig. 5b). However, unlike the forefeet,

272 the absolute distance between the hindfeet increased significantly with speed ( $F_{1,76} = 16.12$ ,  $P$   
273  $< 0.001$ ; Fig. 5a), with no significant interaction between surface and speed ( $F_{1,76} = 0.49$ ,  $P =$   
274  $0.483$ ). Compared with the absolute distance, the fore-aft distance between the hindfeet  
275 shows a considerable drop, below 2 mm and close to the resolution limit of this method  
276 (Figure 5b).

277 Absolute hind-to-fore foot distance was greater on the inclined platform than on the inclined  
278 pole ( $F_{1,78} = 35.73$ ,  $P < 0.001$ ; Fig. 5c), but was unaffected by speed ( $F_{1,78} = 0.58$ ,  $P = 0.446$ )  
279 and the interaction between speed and surface ( $F_{1,78} = 2.51$ ,  $P = 0.117$ ). On the flat surface,  
280 absolute hind-to-fore foot distance was greater at faster speeds ( $F_{1,54} = 14.9$ ,  $P < 0.001$ ),  
281 suggesting faster strides could be achieved by reaching further forwards with the forelimb  
282 pair (Supplementary material). Yet for both the inclined platform and the inclined pole  
283 surfaces, no significant relationship exists between speed and absolute hind-to-fore foot  
284 distance. Results for the fore-aft displacement only (P.distX) largely reflect those of P.dist,  
285 as might be expected, given that much of the displacement between the fore and hindlimbs is  
286 expected to occur along this fore-aft axis.

### 287 *Ground reaction forces*

288 To determine the relative contribution of each of the feet towards propulsion, we recorded the  
289 output of the forces transferred to the substrate (platform or pole) by each limb individually  
290 wherever possible, or by pairs of feet in instances where they touched the force plate  
291 simultaneously (Figure 1d).

292 The integral of the fore-aft force trace with respect to time (impulse) throughout the stance  
293 phase was significantly different among the feet ( $F_{5,100} = 34.3$ ,  $P < 0.001$ ), but did not  
294 significantly differ between the surfaces ( $F_{1,100} = 1.49$ ,  $P = 0.224$ ), nor did it vary with speed  
295 ( $F_{1,100} = 0.15$ ,  $P = 0.698$ ) (Figure 6a). Higher forces were produced by the paired hindfeet  
296 compared with the paired forefeet ( $z = -12.3$ ,  $P < 0.001$ ), and between the paired hindfeet  
297 with either the left ( $z = -8.0$ ,  $P < 0.001$ ) or right ( $z = -6.0$ ,  $P < 0.001$ ) forefoot alone, with no  
298 other comparison being significant. The hindfeet ( $-0.39 \pm 0.026$  N.sec) provide over three  
299 times the propulsive force of the forelimbs ( $-0.12 \pm 0.010$  N.sec) during locomotion on the  
300 inclined surfaces. The minimum of the fore-aft force (which represents the peak reaction  
301 force against quolls pushing themselves forward) decreased significantly with speed ( $F_{1,100} =$   
302  $9.43$ ,  $P = 0.003$ ), indicating an increase in fore-aft force with increasing locomotor speed.

303 Like impulse, there was no effect of surface ( $F_{1,100} = 0.41$ ,  $P = 0.521$ ) on minimum fore-aft  
304 force, but there was significant variation among feet ( $F_{5,100} = 52.2$ ,  $P < 0.001$ ). As for the  
305 impulse above, the hindfeet provided the greatest propulsive force.

306 The integral of the vertical force trace throughout the stance phase was not affected by  
307 surface ( $F_{1,100} = 1.08$ ,  $P = 0.302$ ), foot ( $F_{1,100} = 0.67$ ,  $P = 0.647$ ), nor speed ( $F_{1,100} = 0.00$ ,  $P =$   
308  $0.996$ ), suggesting that all feet contribute near equally to body weight support during  
309 movement (Figure 6b). The mean vertical impulse for all feet was  $-0.055 \pm 0.0072$  N.sec. The  
310 minimum of the vertical force (which represents the peak reaction force against quoll body  
311 weight) was not affected by speed ( $F_{1,100} = 0.11$ ,  $P = 0.743$ ) or surface ( $F_{1,100} = 0.01$ ,  $P =$   
312  $0.935$ ), but was weakly affected by foot ( $F_{5,100} = 2.78$ ,  $P = 0.022$ ), with a post-hoc test  
313 showing only differences between the fore-left foot alone, with the combined forefeet ( $z =$   
314  $3.15$ ,  $P = 0.024$ )

315 The maximum vertical force, which indicates whether the surface is pulled toward the body  
316 during the stance phase, decreased significantly with speed ( $F_{1,100} = 4.97$ ,  $P = 0.028$ ), with  
317 slower strides requiring a greater pulling force. Maximum vertical force was greater on the  
318 inclined pole than the inclined platform ( $1.07 \pm 0.155$  N vs  $0.36 \pm 0.112$  N;  $F_{1,100} = 4.15$ ,  $P =$   
319  $0.044$ ), likely as a result of quolls being better able to grip underneath the narrow pole.  
320 However, maximum vertical force was not significantly different between feet ( $F_{1,100} = 0.55$ ,  
321  $P = 0.732$ ).

322 The lateral force trace integral was not significantly affected by speed ( $F_{1,100} = 0.24$ ,  $P =$   
323  $0.626$ ) or surface ( $F_{1,100} = 0.01$ ,  $P = 0.937$ ), but like the vertical and fore-aft impulse, there  
324 was a significant effect among feet ( $F_{5,100} = 5.91$ ,  $P < 0.001$ ) (Figure 6c). Post-hoc tests  
325 highlighted that the single forelimbs (fore-left and fore-right) were capable of producing  
326 significantly different lateral forces, yet this trend was only evident on the narrow pole  
327 (Figure 6c).

### 328 *Corrective Torques*

329 We explored the magnitude of corrective torques applied along the narrow inclined pole (Fig.  
330 7). We do not report these for the inclined platform, as they could unlikely contribute to  
331 stability on a flat surface, where forelimbs cannot grasp. Neither counter-clockwise nor  
332 clockwise torque was significantly related to speed or foot (counter-clockwise, speed:  $F_{1,59} =$   
333  $0.37$ ,  $P = 0.543$ , foot:  $F_{4,59} = 1.14$ ,  $P = 0.348$ ; clockwise, speed:  $F_{1,59} = 0.02$ ,  $P = 0.879$ , foot:

334  $F_{4,59} = 1.57, P = 0.193$ ). However, when comparing simultaneous foot falls, the paired  
335 forefeet and the paired hindfeet produced substantial corrective torques, likely related with  
336 the decreased distance between fore and hind feet pairs on the inclined pole in comparison to  
337 the inclined platform. The left forelimb produced larger clockwise corrective torques in  
338 comparison to the right forelimb (FL =  $72.15 \pm 18.96$  N.mm, FR =  $16.22 \pm 5.41$  N.mm; n=4). In  
339 contrast, the right forelimb produced greater counter-clockwise corrective torques than the  
340 left forelimb (FL =  $-16.98 \pm 14.17$  N.mm, FR =  $-51.64 \pm 16.83$  N.mm; n=4). The direction of  
341 these corrective torques is consistent with each single forelimb being used in a gripping while  
342 pulling forefoot stride.

## 343 **Discussion**

344 Understanding the extent to which a species has adapted to a specific environment often can  
345 require the combination of relevant performance measures and knowledge of the  
346 biomechanical limitations imposed by that environment. Greater declines in populations of  
347 Northern quoll from open grasslands compared with semi-arboreal rocky habitats suggest  
348 greater predation pressure in open habitats. This presents a unique system to quantify the link  
349 between performance and survival in natural habitats. To explore the extent to which habitat  
350 can compromise the performance of Northern quolls (*Dasyurus hallucatus*) we analysed their  
351 kinematics and kinetics while they moved along terrains designed to represent aspects of their  
352 natural environment.

### 353 *Environment-dependent locomotion in the Northern quoll*

354 We found that quolls used slower speeds when moving on a narrower surface, but used  
355 similar gaits on both wide and narrow inclined structures. This suggests that a quolls' gait  
356 choice is independent of both speed and the structure of the terrain. This highlights the  
357 limitations of examining only variation in classical gait characterizations when comparing the  
358 movement of small, agile animals within habitats of differing complexity. Therefore, we also  
359 measured variation in the kinematic and kinetic patterns of quoll movement.

360 Quolls were capable of moving at similar speeds along the inclined pole as the inclined  
361 platform, but did so using a much higher duty factor. Duty factor is the percentage of the  
362 stride cycle when the foot is in contact with the substrate, suggesting relatively longer stance  
363 phases may be required to provide stabilizing moments on narrow substrates, such as the  
364 inclined pole. In order to maintain similar speeds when using higher duty factors, the quolls  
365 swung their legs faster on the inclined pole. This may provide evidence for an alternative  
366 neuromuscular strategy for arboreal movement in quolls that may not be available to other  
367 species. This increased leg swing speed may be responsible for the increase in the probability  
368 of mistakes, which is present when quolls run at higher speeds, or on narrower surface (Nasir  
369 et al., 2017).

370 We found a similar pattern in the distance and timing of footfalls, whereby distance and time  
371 both decreased at faster speeds and on narrower surfaces. This too suggests a change in the  
372 biomechanical strategy employed by quolls on narrow surfaces, reflecting a coupled use of  
373 limb pairs at higher speeds. Coupled limb behaviour is likely associated with the corrective

374 forces and torques necessary to maintain stability on narrow surfaces (Cartmill, 1985). We  
375 found greater changes in both lateral forces and the ability to produce corrective torques on  
376 narrow, as compared to wide surfaces. Surprisingly, quolls were not only able to produce  
377 corrective torques with simultaneous limb pairs, as previously shown in primates (Chadwell  
378 and Young, 2015), but also with single limb surface contacts. These former corrective torques,  
379 between left and right limbs of a girdle, likely explains why we observed a decrease in the  
380 timing and distance of footfalls, suggesting that like primates, quolls expand their effective  
381 grasp by gripping the substrate between limb pairs. But this latter single limb torque pattern  
382 indicates a level of complexity in the forefeet which appear in some cases to grip the narrow  
383 surface using a single foot and produce significant corrective ‘pulling’ torques.

#### 384 *Cats and dogs: changes in gait parameters*

385 The decreased population density of Northern quolls in open grassland habitats is often  
386 attributed to introduced predators such as cats and dogs, and a decrease in habitat complexity  
387 due to land clearing, altered fire regimes, or grazing by invasive herbivores (Newsome, 1975,  
388 Burbidge and McKenzie, 1989, McKenzie et al., 2007, Oakwood, 2000). A comparison of the  
389 biomechanical capacities between quolls, cats, and dogs may therefore provide insight into  
390 the relative performance of these predators and quolls in different habitats. Galves-Lopez *et*  
391 *al.* (Gálvez-López et al., 2011) compared the kinematics of cats and dogs on a raised narrow  
392 wooden beam to that of unconstrained overground locomotion, mirroring the experimental  
393 protocol used in this study. Similar to quolls, cats adopted lower speeds on narrow supports  
394 as compared to overground surfaces, but unlike quolls, swing phase duration was independent  
395 of speed during narrow support locomotion (Gálvez-López et al., 2011). During overground  
396 locomotion, the swing phase duration of cats decreased with increasing speed, but did not  
397 change on narrow surfaces, suggesting that cats are unable to take faster steps on narrow  
398 structures but instead appear to take longer strides. In contrast, quolls use an absolutely lower  
399 swing phase duration at any speed on narrow structures, implying different control strategies  
400 between cats and quolls. Further, unlike quolls, where we found a significant decrease in the  
401 timing between forefeet contact among narrow and wide surfaces, cats deviate from this  
402 pattern and increase the timing between forefeet contacts on these narrow structures. The  
403 extent to which this limits their ability to produce corrective torques, as found in quolls,  
404 remains to be shown.

405 In contrast to quolls and cats, which both decrease their speeds on narrower surfaces, dogs  
406 adopt higher speeds. These higher speeds are achieved via an increase in both stride  
407 frequency and stride length, and a decrease in stance phase duration, leading to lower duty  
408 factors on narrower substrates (Gálvez-López et al., 2011). Combined, the biomechanical  
409 traits evident in dogs on narrow substrates suggest a reduced degree of static stability and an  
410 increased reliance on dynamic stability. Static stability is the process by which an animal  
411 remains stable because the forces and torques produced by gravity are near equal and  
412 opposite to the ground reaction forces and moments (Lammers and Zurcher, 2011a).  
413 However, at higher speeds it becomes increasingly difficult to maintain static stability.  
414 Dynamic stability is the process whereby an animal remains stable due to the presence of an  
415 angular momentum created by the cyclical motion of the limbs. This cyclical motion  
416 produces a ‘gyroscopic effect’ where if a small disturbance changes the lean of a body, the  
417 gravitational force produces a restoring torque about the fore-aft axis to maintain stability.  
418 Truly arboreal species appear to avoid highly dynamically stable gaits (Lammers and  
419 Zurcher, 2011a), which is likely related to the discontinuous, multi-dimensional, and  
420 frequently unstable characteristics of arboreal habitats. This suggests larger terrestrial animals,  
421 like dogs, may be at risk of increasing the probability of mistakes on narrow substrates,  
422 though this remains to be shown. However, this may not be true in small arboreal specialists,  
423 like chipmunks who exploit dynamic stability during locomotion (Lammers and Zurcher,  
424 2011b).

425 *How do Northern quolls compare with other arboreal species?*

426 Kinematic comparisons of semi-arboreal Northern quolls with other arboreal species may help  
427 to determine the extent to which quolls are selected for an arboreal versus terrestrial  
428 environment. Like quolls, among 7 species of marsupials (opossums), relative velocities  
429 increased with support diameter (Delciellos and Vieira, 2009), indicating a transition to  
430 slower and more stable gaits on narrower structures. Similar control strategies to quolls were  
431 evident among mouse lemurs, where limb contact time increased on narrow structures, likely  
432 to aid stability through an increase in the time available to apply corrective torques (Shapiro  
433 et al., 2016). Though this latter species did differ by showing an increase (rather than a  
434 decrease in quolls) in the time between the trailing and leading limbs (P.lag) on narrow  
435 surfaces.



436 Greater differences were observed between quolls and rats (Camargo et al., 2015). Arboreal  
437 rat species tend to increase stride frequency and decrease stride length on narrow structures,  
438 compared to terrestrial species that decrease both stride length and frequency. Thus, arboreal  
439 species show an increase in speed on narrow structures, whereas terrestrial species slow down  
440 (Camargo et al., 2015). The biomechanical control strategies used by quolls is therefore more  
441 akin to terrestrial than arboreal rats.

442 A kinematic pattern common among arboreal specialists, particularly among primates, is the  
443 use of a diagonal-sequence footfall pattern during walking, where the fore-left and hind-right  
444 limbs (or vice-versa) are used in conjunction during stance (Muybridge, 1887, Prost, 1965,  
445 Prost, 1969, Hildebrand, 1966, Hildebrand, 1977, Hildebrand, 1980, Hildebrand, 1985,  
446 Vilensky and Larson, 1989, Lemelin and Grafton, 1998, Cartmill et al., 2002). This footfall  
447 pattern is often thought to be beneficial when used in association with grasping extremities  
448 when moving and foraging on thin flexible branches. This theory was tested among the grey  
449 short-tailed opossum (*Monodelphis domestica*) and the woolly opossum (*Caluromys*  
450 *philander*) – and showed that the latter species, which possessed more developed grasping  
451 extremities, showed a greater use of diagonal-sequence walking gaits (Lemelin et al., 2003).  
452 In the current study, this walking sequence was not observed among quolls, with P.lag values  
453 approximating 0.5, indicating forefeet or hindfeet pairs are used (rather than diagonals)  
454 during bounds and half-bounds. Thus despite at least some ability to grasp, quolls display gait  
455 characteristics which suggest an important role of terrestrial locomotion and an increased  
456 reliance on dynamic stability while on narrow structures.

457 Kinetic comparisons also showed differences between classically arboreal species and quolls.  
458 Like quolls, the grey short-tailed opossum (*Monodelphis domestica*) showed both fore- and  
459 hind limbs had equal roles in body weight support (vertical force) on inclined surfaces  
460 (Lammers and Biknevicius, 2004). However, differences arose in propulsive forces (fore-aft):  
461 in quolls, the hindlimbs produced the majority of the propulsive impulse whereas in  
462 opossums, it was the forelimbs which exerted the greater propulsive impulse (Lammers et al.,  
463 2006).

464 It has further been hypothesised that much of the kinematic changes to gait on narrow  
465 supports are linked to a functional reduction in the vertical impulse, which would reduce  
466 oscillations of the centre of mass and increase stability on narrow structures (Gálvez-López et  
467 al., 2011, Schmitt and Lemelin, 2002, Schmitt et al., 2006, Young, 2009, Lemelin and

468 Cartmill, 2010). However, in the current study we found little or no evidence for a decrease  
469 in vertical impulse on narrow supports which may function to reduce these oscillations. In  
470 other species, vertical impulses were lower on arboreal supports for the common marmoset  
471 (*Callithrix jacchus*) (Chadwell and Young, 2015) and the grey short-tailed opossum  
472 (Lammers and Biknevicius, 2004), although the authors caution that in this latter species, this  
473 may be attributed to differences in speed between the treatments.

474 The torques generated by the limbs about the long axis of a branch during locomotion may  
475 also be important for stable locomotion on arboreal substrates. Although several  
476 characteristics of quoll locomotion resemble terrestrial species, quolls appear more similar to  
477 arboreal species in their ability to produce stabilizing torques on narrow supports. For  
478 example, the grey short-tailed opossum (*Monodelphis domestica*) uses long-axis torque to  
479 avoid toppling on a branch, though in this species the forelimbs generated significantly  
480 greater torque than the hindlimbs which is probably explained by the greater weight bearing  
481 role of the former (Lammers and Gauntner, 2008). Similarly, the Siberian chipmunk (*Tamias*  
482 *sibiricus*) produced considerable torque to counteract rolling moments which were equal  
483 between the fore and hindlimbs (Lammers and Zurcher, 2011b). Further, like quolls, the total  
484 impulse of the rolling torques in these chipmunks was usually greater than or less than zero  
485 (ie: not balanced within a stride). This indicates that like chipmunks, quolls may balance out  
486 the torques acting on the centre of mass over the course of two or more strides to maintain  
487 stability.

#### 488 *A biomechanical framework to predict the survival of key species*

489 These comparisons suggest that there are multiple biomechanical strategies available to  
490 achieve support on narrow substrates, and the degree to which different species exploit these  
491 strategies varies along a spectrum from fully terrestrial, to semi-arboreal, to fully arboreal.  
492 Northern quolls are often described as semi-arboreal specialists (Schmitt et al., 1989).  
493 Consistent with this we show many of the gait characteristics associated with quolls appear  
494 similar with terrestrial species, with some characteristics useful in arboreal habitats.

495 Historically Northern quolls occupied both floodplains (terrestrial) and rocky (semi-arboreal)  
496 habitats. Our biomechanical analyses suggest that cats and dogs are likely superior in  
497 terrestrial environments, owing to their larger body size and greater speeds (Gálvez-López et  
498 al., 2011). This may partially explain the declines and/or reduced populations of Northern

499 quolls in these terrestrial environments (Oakwood, 2000). Conversely, quolls appear to have  
500 biomechanical characteristics consistent with a stability advantage at higher speeds on narrow  
501 supports when compared to cats and dogs (Gálvez-López et al., 2011), likely explaining why  
502 the decrease in quoll populations in semi-arboreal habitats (such as rocky outcrops) has not  
503 been as severe (Oakwood, 2000). However, quolls did not show many of the characteristics  
504 common in truly arboreal specialists (e.g. diagonal sequence gaits) such as opossums, which  
505 may explain why populations of quolls are showing more obvious signs of decline than other  
506 native species such as possums (Woinarski et al., 2001). Quolls appear to share a larger  
507 percentage of their performance space with cats and dogs, and this overlap, combined with  
508 reductions in habitat complexity, may be directly related to their declining population on  
509 mainland Australia.

510 Here we show the value in using biomechanical analyses to predict the survival and fitness of  
511 key species within a habitat (Wilson et al., 2018). The relative performance of a species,  
512 results from its ability to employ biomechanical strategies necessary to maintain stability and  
513 outperform key predators (invasive or otherwise) within that habitat. This concept may  
514 become even more important as we move to a period of increased human impact within the  
515 Anthropocene, and may allow us to predict the influence of climate change, urbanization, and  
516 deforestation on species of conservation importance.

### 517 **Acknowledgements**

518 We thank members and volunteers of the Wilson Performance Lab for assistance with  
519 running the experiments in the field. We also thank the Anindilyakwa Land and Sea Rangers  
520 of Groote Eylandt for their generous assistance, logistical support and use of laboratory  
521 facilities. We also thank the traditional owners of Groote Eylandt for their generous support  
522 and access to their land.

### 523 **Competing Interests**

524 The authors declare no competing interests.

### 525 **Funding**

526 This project was supported by the Anindilyakwa Land Council, a University of Queensland  
527 collaboration and Industry Engagement Fund (UQ-CIEF) grant awarded to RSW, an

528 Australian Research Council (ARC) DECRA awarded to CJC (DEXX), an ARC Discovery  
529 Grant awarded to RSW and CJC (DEXX), and an ARC Future Fellowship awarded to RSW  
530 (FT150100492)

## 531 REFERENCES

- 532 ABOURACHID, A. 2003. A new way of analysing symmetrical and asymmetrical gaits in quadrupeds.  
533 *Comptes Rendus Biologies*, 326, 625-630.
- 534 ARNOLD, S. J. 1983. Morphology, performance and fitness. *American Zoologist*, 23, 347-361.
- 535 BRAITHWAITE, R. W. & GRIFFITHS, A. D. 1994. Demographic variation and range contraction in the  
536 northern quoll, *Dasyurus hallucatus* (Marsupialia: Dasyuridae). *Wildlife Research*, 21, 203-  
537 217.
- 538 BRAITHWAITE, R. W. & MULLER, W. J. 1997. Rainfall, groundwater and refuges: predicting  
539 extinctions of Australian tropical mammal species. *Austral Ecology*, 22, 57-67.
- 540 BURBIDGE, A. A., JOHNSON, K. A., FULLER, P. J. & SOUTHGATE, R. I. 1988. Aboriginal knowledge of  
541 the mammals of the central deserts of Australia. *Wildlife Research*, 15, 9-39.
- 542 BURBIDGE, A. A. & MCKENZIE, N. L. 1989. Patterns in the modern decline of Western Australia's  
543 vertebrate fauna: causes and conservation implications. *Biological conservation*, 50, 143-198.
- 544 CAMARGO, N. F., SANO, N. Y., RIBEIRO, J. F. & VIEIRA, E. M. 2015. Contrasting the realized and  
545 fundamental niche of the arboreal walking performance of neotropical rodents. *Journal of*  
546 *Mammalogy*, 97, 155-166.
- 547 CARTMILL, M. 1985. Climbing. In: M. HILDEBRAND, D. B., K. LIEM, D. WAKE (ed.) *Functional*  
548 *vertebrate morphology*. Cambridge, MA: Belknap Press.
- 549 CARTMILL, M., LEMELIN, P. & SCHMITT, D. 2002. Support polygons and symmetrical gaits in  
550 mammals. *Zoological Journal of the Linnean Society*, 136, 401-420.
- 551 CHADWELL, B. A. & YOUNG, J. W. 2015. Angular momentum and arboreal stability in common  
552 marmosets (*Callithrix jacchus*). *American journal of physical anthropology*, 156, 565-576.
- 553 CORBETT, L. K. 1995. *The dingo in Australia and Asia*, Sydney, University of New South Wales Press.
- 554 DELCIELLOS, A. C. & VIEIRA, M. V. 2009. Allometric, phylogenetic, and adaptive components of  
555 climbing performance in seven species of didelphid marsupials. *Journal of Mammalogy*, 90,  
556 104-113.
- 557 GÁLVEZ-LÓPEZ, E., MAES, L. D. & ABOURACHID, A. 2011. The search for stability on narrow supports:  
558 an experimental study in cats and dogs. *Zoology*, 114, 224-232.
- 559 GARLAND JR, T. & LOSOS, J. B. 1994. Ecological morphology of locomotor performance in squamate  
560 reptiles. In: WAINWRIGHT, P. C. & REILLY, S. (eds.) *Ecological morphology: integrative*  
561 *organismal biology*. Chicago: University of Chicago Press.
- 562 HEDRICK, T. L. 2008. Software techniques for two-and three-dimensional kinematic measurements  
563 of biological and biomimetic systems. *Bioinspiration & biomimetics*, 3, 034001.
- 564 HILDEBRAND, M. 1966. Analysis of the symmetrical gaits of tetrapods. *Fol. Biotheor*, 9-22.
- 565 HILDEBRAND, M. 1977. Analysis of asymmetrical gaits. *Journal of Mammalogy*, 58, 131-156.
- 566 HILDEBRAND, M. 1980. The adaptive significance of tetrapod gait selection. *American Zoologist*, 20,  
567 255-267.
- 568 HILDEBRAND, M. 1985. Walking and running. In: M HILDEBRAND, D. B., KF LIEM, DB WAKE (ed.)  
569 *Functional vertebrate morphology*. Cambridge, MA: Harvard University Press.
- 570 HOHNEN, R., TUFT, K., MCGREGOR, H. W., LEGGE, S., RADFORD, I. J. & JOHNSON, C. N. 2016.  
571 Occupancy of the invasive feral cat varies with habitat complexity. *PLoS One*, 11, e0152520.
- 572 HOTHORN, T., BRETZ, F. & WESTFALL, P. 2008. Simultaneous inference in general parametric models.  
573 *Biometrical journal*, 50, 346-363.

- 574 JACKSON, B. E., EVANGELISTA, D. J., RAY, D. D. & HEDRICK, T. L. 2016. 3D for the people: multi-  
575 camera motion capture in the field with consumer-grade cameras and open source software.  
576 *Biology Open*, 5, 1334-1342.
- 577 LAMMERS, A. R. & BIKNEVICIUS, A. R. 2004. The biodynamics of arboreal locomotion: the effects of  
578 substrate diameter on locomotor kinetics in the gray short-tailed opossum (*Monodelphis*  
579 *domestica*). *Journal of Experimental Biology*, 207, 4325-4336.
- 580 LAMMERS, A. R., EARLS, K. D. & BIKNEVICIUS, A. R. 2006. Locomotor kinetics and kinematics on  
581 inclines and declines in the gray short-tailed opossum *Monodelphis domestica*. *Journal of*  
582 *Experimental Biology*, 209, 4154-4166.
- 583 LAMMERS, A. R. & GAUNTNER, T. 2008. Mechanics of torque generation during quadrupedal  
584 arboreal locomotion. *Journal of biomechanics*, 41, 2388-2395.
- 585 LAMMERS, A. R. & ZURCHER, U. 2011a. Stability during arboreal locomotion. In: KLIKA, V. (ed.)  
586 *Theoretical biomechanics*. InTech.
- 587 LAMMERS, A. R. & ZURCHER, U. 2011b. Torque around the center of mass: dynamic stability during  
588 quadrupedal arboreal locomotion in the Siberian chipmunk (*Tamias sibiricus*). *Zoology*, 114,  
589 95-103.
- 590 LEMELIN, P. & CARTMILL, M. 2010. The effect of substrate size on the locomotion and gait patterns  
591 of the kinkajou (*Potos flavus*). *Journal of Experimental Zoology Part A: Ecological and*  
592 *Integrative Physiology*, 313, 157-168.
- 593 LEMELIN, P. & GRAFTON, B. W. 1998. Grasping performance in *Saguinus midas* and the evolution of  
594 hand prehensility in primates. In: E STRASSER, J. F., AL ROSENBERGER, H MCHENRY (ed.)  
595 *Primate locomotion*. Boston, MA: Springer.
- 596 LEMELIN, P., SCHMITT, D. & CARTMILL, M. 2003. Footfall patterns and interlimb co-ordination in  
597 opossums (Family Didelphidae): evidence for the evolution of diagonal-sequence walking  
598 gaits in primates. *Journal of Zoology*, 260, 423-429.
- 599 MCGREGOR, H., LEGGE, S., JONES, M. E. & JOHNSON, C. N. 2015. Feral cats are better killers in open  
600 habitats, revealed by animal-borne video. *PloS one*, 10, e0133915.
- 601 MCKENZIE, N. L., BURBIDGE, A. A., BAYNES, A., BRERETON, R. N., DICKMAN, C. R., GORDON, G.,  
602 GIBSON, L., MENKHORST, P. W., ROBINSON, A. C. & WILLIAMS, M. R. 2007. Analysis of  
603 factors implicated in the recent decline of Australia's mammal fauna. *Journal of*  
604 *Biogeography*, 34, 597-611.
- 605 MORRIS, I. 1996. *Kakadu National Park, Australia*, Fortitude Valley, Australia, Steve Parish.
- 606 MUYBRIDGE, E. 1887. *Animal locomotion*, Da Capo Press.
- 607 NASIR, A. A. F. A., CLEMENTE, C. J., WYNN, M. L. & WILSON, R. S. 2017. Optimal running speeds when  
608 there is a trade-off between speed and the probability of mistakes. *Functional Ecology*, 31,  
609 1941-1949.
- 610 NEWSOME, A. E. 1975. An ecological comparison of the two arid-zone kangaroos of Australia, and  
611 their anomalous prosperity since the introduction of ruminant stock to their environment.  
612 *The Quarterly review of biology*, 50, 389-424.
- 613 OAKWOOD, M. 2000. Reproduction and demography of the northern quoll, *Dasyurus hallucatus*, in  
614 the lowland savanna of northern Australia. *Australian Journal of Zoology*, 48, 519-539.
- 615 PINHEIRO, J., BATES, D., DEBROY, S., SARKAR, D. & R CORE TEAM 2017. nlme: Linear and Nonlinear  
616 Mixed Effects Models. *R package version 3.1-131*.
- 617 PROST, J. 1965. The methodology of gait analysis and gaits of monkeys. *American journal of physical*  
618 *anthropology*, 23, 215-240.
- 619 PROST, J. 1969. A replication study on monkey gaits. *American Journal of Physical Anthropology*, 30,  
620 203-208.
- 621 SCHMITT, D., CARTMILL, M., GRIFFIN, T. M., HANNA, J. B. & LEMELIN, P. 2006. Adaptive value of  
622 ambling gaits in primates and other mammals. *Journal of Experimental Biology*, 209, 2042-  
623 2049.

- 624 SCHMITT, D. & LEMELIN, P. 2002. Origins of primate locomotion: gait mechanics of the woolly  
625 opossum. *American Journal of Physical Anthropology*, 118, 231-238.
- 626 SCHMITT, L. H., BRADLEY, A. J., KEMPER, C. M., KITCHENER, D. J., HUMPHREYS, W. F. & HOW, R. A.  
627 1989. Ecology and physiology of the northern quoll, *Dasyurus hallucatus* (Marsupialia,  
628 Dasyuridae), at Mitchell Plateau, Kimberley, Western Australia. *Journal of Zoology*, 217, 539-  
629 558.
- 630 SCHOENER, T. W. 2009. The ecological niche. *In*: COLWELL, R. K., LEVIN, S. A., CARPENTER, S. R.,  
631 GODFRAY, H. C. J., KINZIG, A. P., LOREAU, M., LOSOS, J. B., WALKER, B. & WILCOVE, D. S.  
632 (eds.) *The Princeton Guide to Ecology*. Princeton (NJ): Princeton University Press.
- 633 SHAPIRO, L. J., KEMP, A. D. & YOUNG, J. W. 2016. Effects of substrate size and orientation on  
634 quadrupedal gait kinematics in mouse lemurs (*Microcebus murinus*). *Journal of Experimental*  
635 *Zoology Part A: Ecological and Integrative Physiology*, 325, 329-343.
- 636 VILENSKY, J. A. & LARSON, S. G. 1989. Primate locomotion: utilization and control of symmetrical  
637 gaits. *Annual review of Anthropology*, 18, 17-35.
- 638 WILSON, A. M., HUBEL, T. Y., WILSHIN, S. D., LOWE, J. C., LORENC, M., DEWHIRST, O. P., BARTLAM-  
639 BROOKS, H. L., DIACK, R., BENNITT, E. & GOLABEK, K. A. 2018. Biomechanics of predator-  
640 prey arms race in lion, zebra, cheetah and impala. *Nature*.
- 641 WOINARSKI, J. C. Z., MILNE, D. J. & WANGANEEN, G. 2001. Changes in mammal populations in  
642 relatively intact landscapes of Kakadu National Park, Northern Territory, Australia. *Austral*  
643 *Ecology*, 26, 360-370.
- 644 WYNN, M. L., CLEMENTE, C. J., NASIR, A. F. A. A. & WILSON, R. S. 2015. Running faster causes  
645 disaster: trade-offs between speed, manoeuvrability and motor control when running  
646 around corners in northern quolls (*Dasyurus hallucatus*). *Journal of Experimental Biology*,  
647 218, 433-439.
- 648 YOUNG, J. W. 2009. Substrate determines asymmetrical gait dynamics in marmosets (*Callithrix*  
649 *jacchus*) and squirrel monkeys (*Saimiri boliviensis*). *American journal of physical*  
650 *anthropology*, 138, 403-420.

651

652

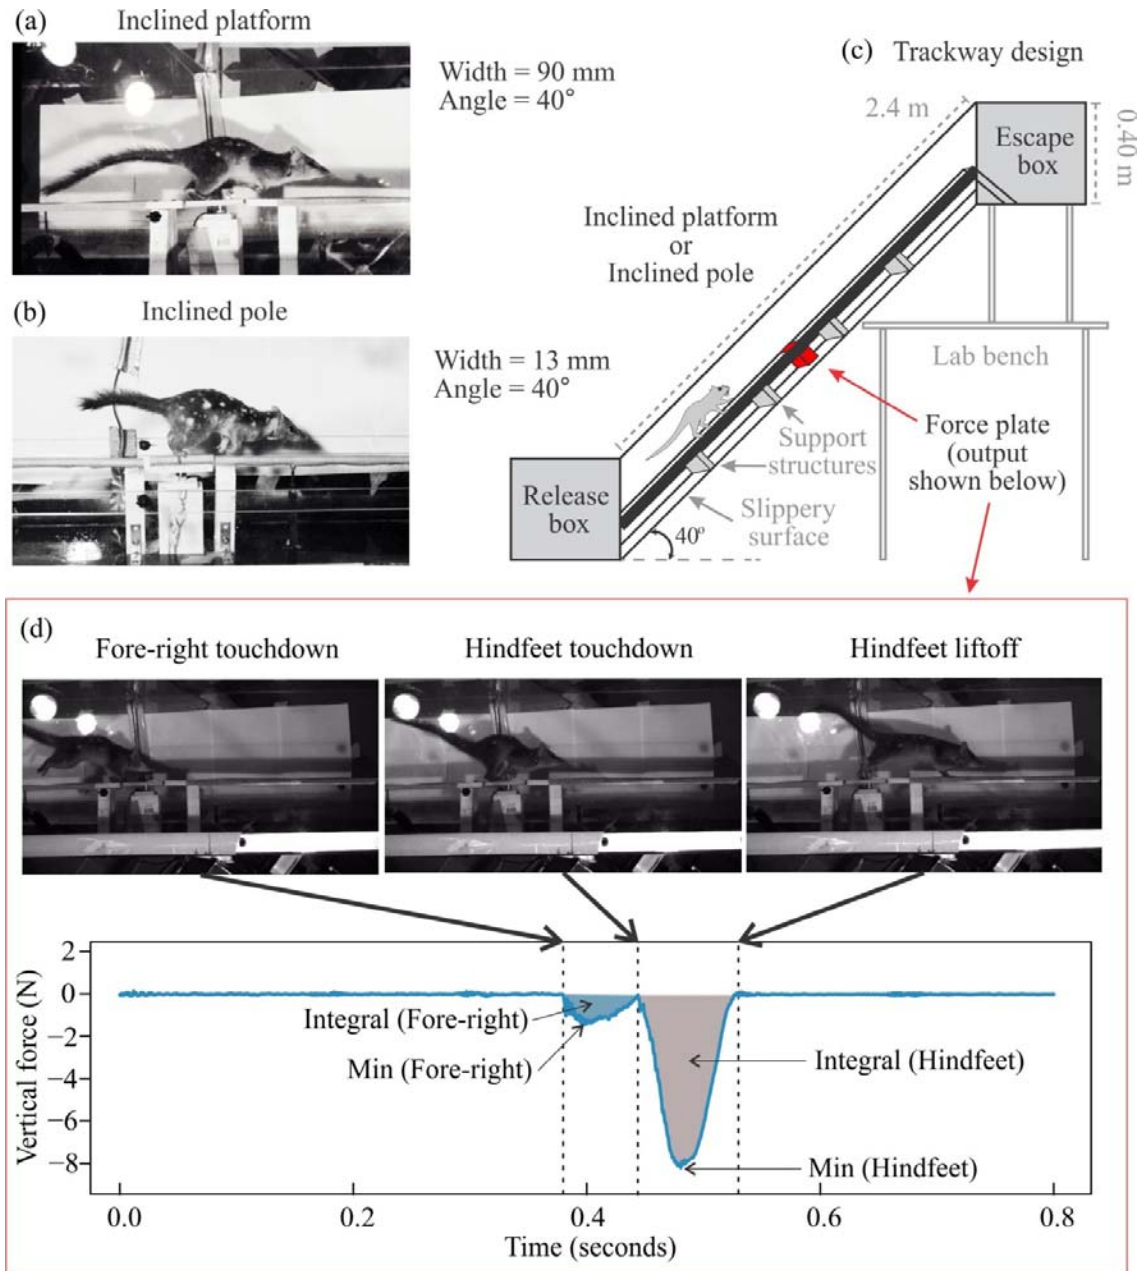

653  
654 **Figure 1. Schematic of experiment setup: a) Northern quoll (*Dasyurus hallucatus*)**  
655 **running on inclined platform, b) quoll running on inclined narrow pole, c) schematic of**  
656 **custom made experimental setup showing location of force plate, and d) vertical**  
657 **substrate reaction force trace over time for a single forelimb followed by both hindlimbs**  
658 **with representative images shown above. Shaded regions represent integral with respect**  
659 **to time (impulse) for the fore-right (blue) and hind-left and hind-right combined (grey).**

660

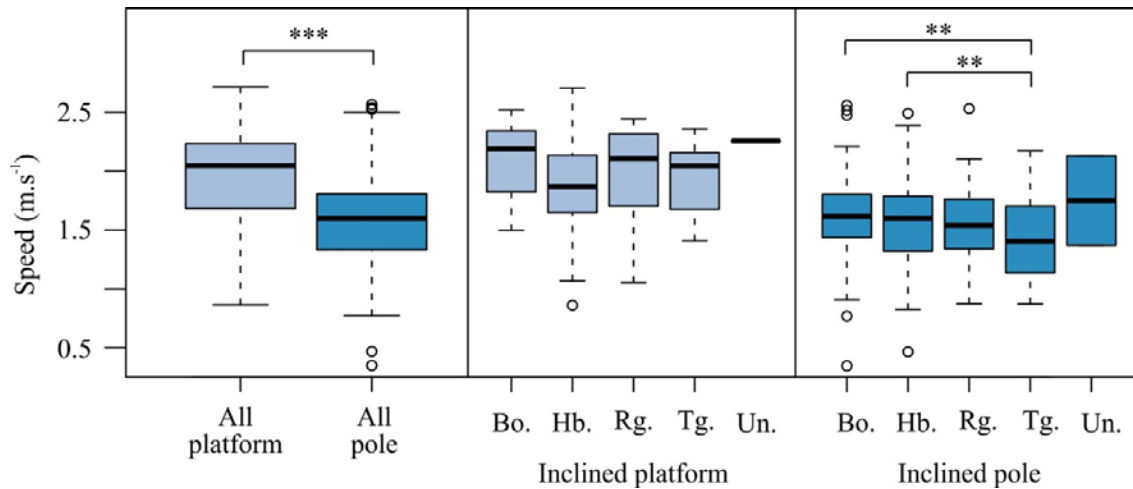

661

662 **Figure 2. Variation in speed with surface and gait in Northern quolls (*Dasyurus***  
663 ***hallucatus*). Speed varies significantly between the surfaces and with gait choice. Bo –**  
664 **Bound, HB – Half bound, Rg – Rotary gallop, Tg – Transverse gallop, Un – Unknown.**  
665 **\*\*\* indicates  $P < 0.001$ , \*\* indicates  $P < 0.01$ . Boxes represent the median, with hinges**  
666 **representing the first and third quartiles; whiskers represent the 95% CIs, and dots**  
667 **represent outliers.**

668

669

670

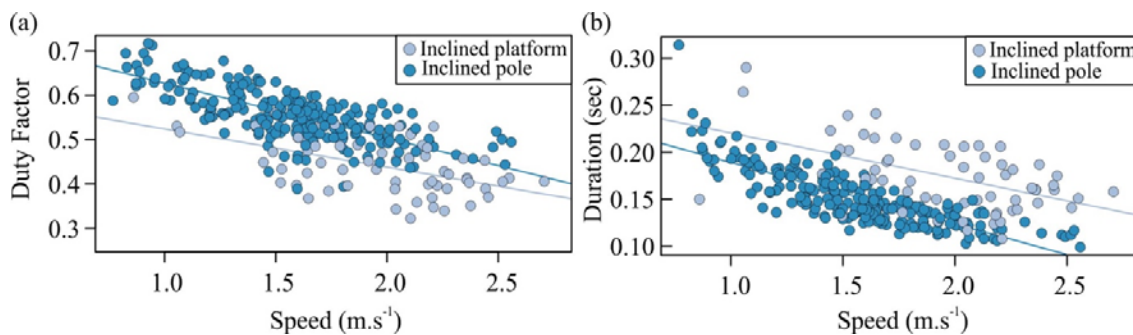

671

672 **Figure 3. Relationship between speed and duty factor a) and speed and swing time and**  
673 **b) for the inclined platform (light) and inclined pole (dark) conditions. Solid lines**  
674 **indicate linear regression model for each condition.**

675



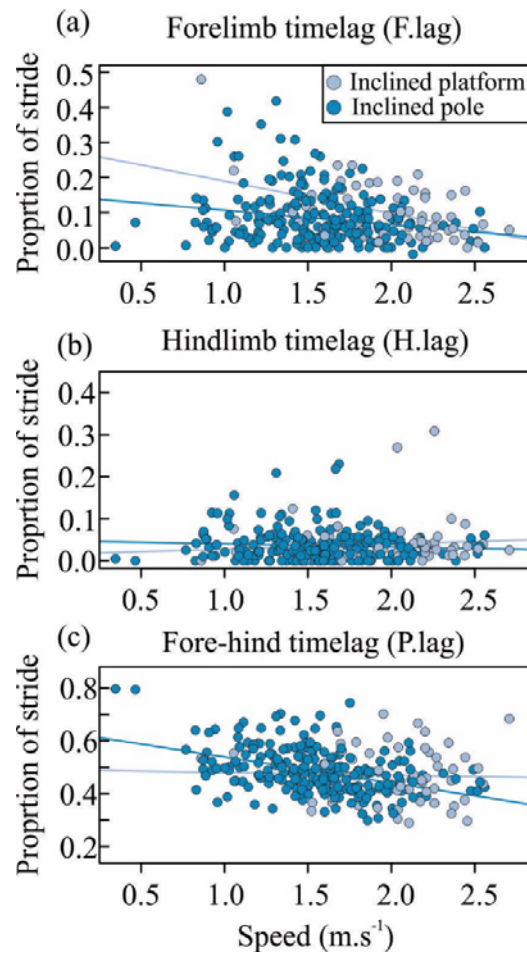

676

677 **Figure 4. Relationship between a) speed and forelimb timelag (F.lag), b) hindlimb**  
678 **timelag (H.lag) and c) fore-hind timelag (P.lag) for the inclined platform (light) and**  
679 **inclined pole (dark) conditions. Solid lines indicate linear regression model for each**  
680 **condition. F.lag, H.lag, and P.lag were calculated as the temporal lag between the mid-**  
681 **stances of the two forefeet, hindfeet, and averaged across the ipsilateral feet,**  
682 **respectively divided by the total stride time.**

683

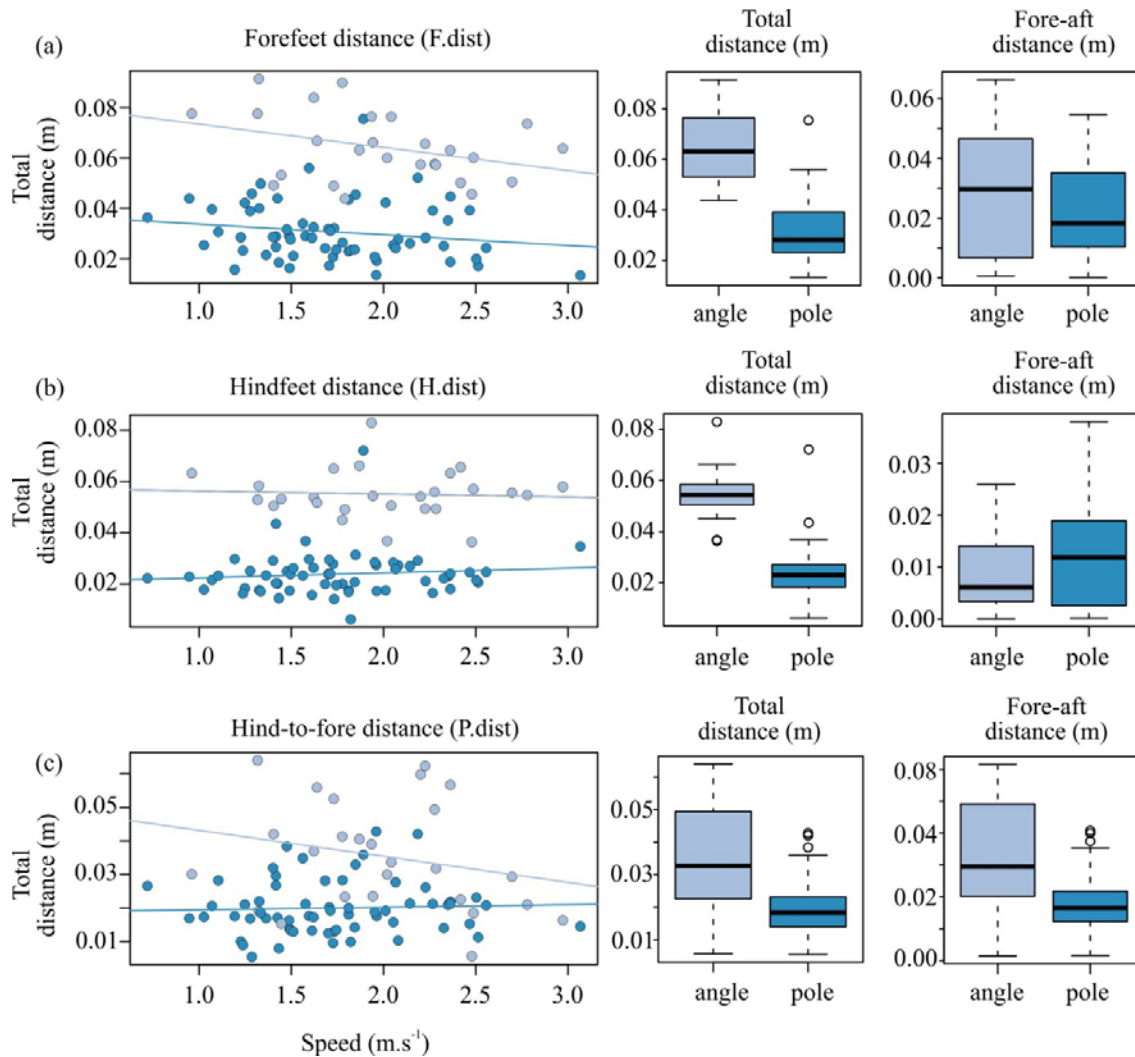

685 **Figure 5. Distances between foot falls; a) for the left and right forefeet (F.dist), b) the**  
686 **left and right hindfeet (H.dist) and c) the mean distance between the forefoot pair and**  
687 **the hindfoot pair (P.dist) for the inclined platform (light) and inclined pole (dark).**  
688 **Given that lateral distances are constrained on the narrow inclined pole, we also report**  
689 **the fore-aft distances between each foot pair.**

690

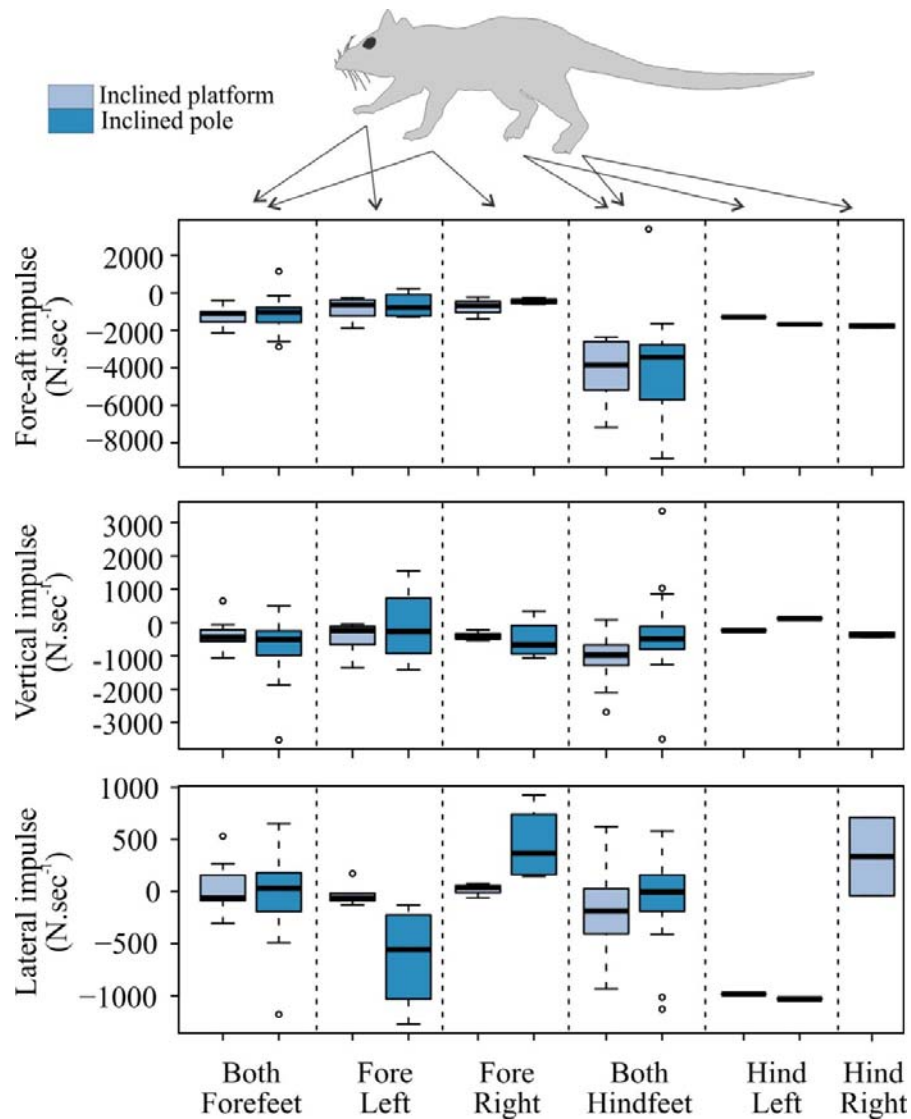

691

692 **Figure 6. Impulse determining the relative contribution of each of the feet where**  
693 **possible, or for pairs of feet where they touch the force plate simultaneously for the**  
694 **Northern quoll (*Dasyurus hallucatus*). Impulse was calculated as the integral of the**  
695 **force trace with respect to time for a) the fore-aft, b) vertical, and c) lateral directions**  
696 **for inclined platform (light) and inclined pole (dark). Positive lateral impulses indicate**  
697 **force directed towards the left and vice versa. Box and whisker plots as per Figure 2.**

698

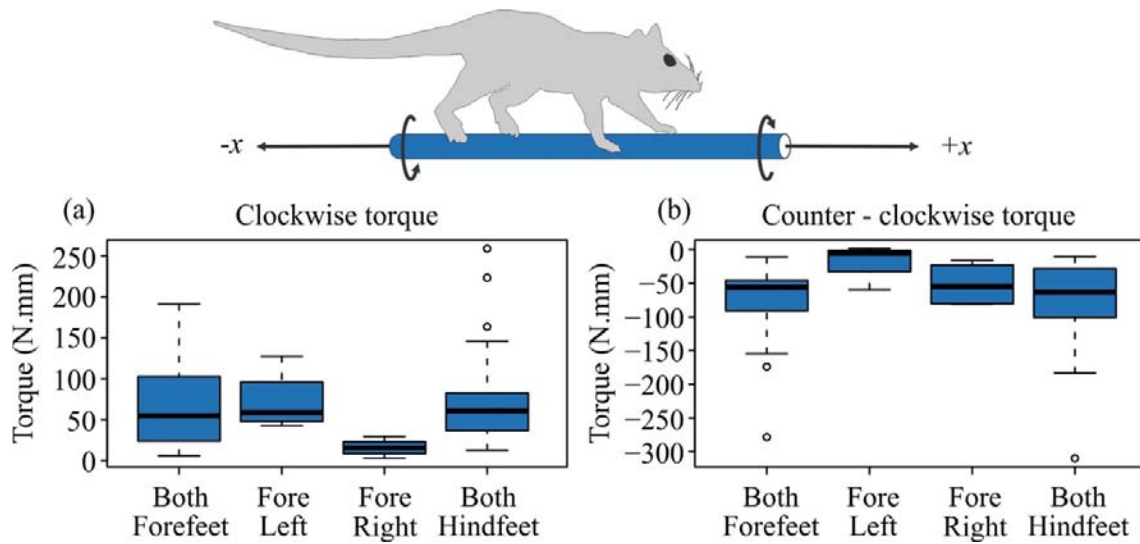

699

700 **Figure 7. Maximum corrective torques in the a) clockwise and b) counter clockwise**  
701 **directions on the inclined pole for the different combinations of foot limb pairs for the**  
702 **Northern quoll (*Dasyurus hallucatus*). The direction of torques is consistent with the**  
703 **right-hand rule. Sufficient data was not available for single hindlimbs. Box and whisker**  
704 **plots as per Figure 2.**
